## Mutations affecting xanthophore pigmentation in the zebrafish, *Danio rerio*

Jörg Odenthal\*, Karin Rossnagel, Pascal Haffter, Robert N. Kelsh†, Elisabeth Vogelsang‡, Michael Brand§, Fredericus J. M. van Eeden, Makoto Furutani-Seiki, Michael Granato, Matthias Hammerschmidt¶, Carl-Philipp Heisenberg, Yun-Jin Jiang, Donald A. Kane, Mary C. Mullins\*\* and Christiane Nüsslein-Volhard

Max-Planck Institut für Entwicklungsbiologie, Spemannstrasse 35/III, 72076 Tübingen, Germany

\*Author for correspondence

†Present address: Institute of Neuroscience, University of Oregon, Eugene, Oregon 97403, USA

‡Present address: Institut für Genetik der Universität Köln, Weyertal 121, 50931 Köln, Germany

§Present address: Institut für Neurobiologie, Universität Heidelberg, Im Neuenheimer Feld 364, 69120 Heidelberg, Germany

¶Present address: Harvard University, Department of Molecular and Cellular Biology, 16 Divinity Avenue, Cambridge, MA 02138, USA

\*\*Present address: Department of Biology, University of Pennsylvania, Philadelphia PA 19104, USA

### SUMMARY

In a large-scale screen for mutants with defects in embryonic development we identified 17 genes (65 mutants) specifically required for the development of xanthophores. We provide evidence that these genes are required for three different aspects of xanthophore development. (1) Pigment cell formation and migration (*pfeffer* and *salz*); (2) pigment synthesis (*edison*, *yobo*, *yocca* and *brie*) and (3) pigment translocation (*esrom*, *tilsit* and *tofu*). The number of xanthophore cells that appear in the body is reduced in embryos with mutations in the two genes, *salz* and *pfeffer*. In heterozygous and homozygous *salz* and *pfeffer* adults, the melanophore stripes are interrupted, indicating that xanthophore cells have an important function in adult melanophore pattern formation. Most other genes affect only larval pigmentation. In embryos

mutant for *edison*, *yobo*, *yocca* and *brie*, differences in pteridine synthesis can be observed under UV light and by thin-layer chromatography. Homozygous mutant females of *yobo* show a recessive maternal effect. Embryonic development is slowed down and embryos display head and tail truncations. Xanthophores in larvae mutant in the three genes *esrom*, *tilsit* and *tofu* appear less spread out. In addition, these mutants display a defect in retinotectal axon pathfinding. These mutations may affect xanthophore pigment distribution within the cells or xanthophore cell shape. Mutations in seven genes affecting xanthophore pigmentation remain unclassified.

Key words: pigment cells, chromatophores, xanthophores, pigment pattern, pigment translocation, pteridines, maternal effect

### INTRODUCTION

Skin coloration in fish and amphibia is created by the interaction of light with pigmented cells (melanophores, xanthophores and iridophores), that are derived from the neural crest (DuShane, 1934; Rawles, 1944). Within these cells, pigments are located in specialized pigment organelles such as melanosomes, which contain melanin (Charles and Ingram, 1959; Drochmans, 1960; Birbeck, 1963); pterinosomes, which contain pteridines in xanthophores (Matsumoto, 1965a; Kamei-Takeuchi and Hama, 1971; Bagnara, 1976); and the reflecting platelets which contain purines in iridophores (Bagnara and Stackhouse 1961; Bagnara et al., 1979). Pterinosomes, like melanosomes, are derived from the Golgi complex (Obika, 1993). They contain a species-specific set of pteridines that appear simultaneously with the differentiation of xanthophores (Matsumoto et al., 1960; Hama, 1963; Obika, 1963; Matsumoto, 1965b). Sepiapterins, drosopterins and several colourless pteridines can be detected as yellow pigmentation that first becomes visible within pterinosomes (Obika, 1963; Kamei-Takeuchi and Hama, 1971). These pteridines are largely the same as the pteridines described for

*Drosophila* eye pigmentation (Matsumoto, 1965a; Bagnara, 1966; Matsumoto and Obika, 1968; Frost and Malacinski, 1980).

Pigment organelles in individual chromatophores can be transported along uncharacterized paths radiating from the cell center, so that the organelles are either dispersed throughout the cytoplasm or aggregated in the center of the cell (Taylor, 1992). The distribution of pigment organelles within pigment cells is important in determining the general colouration of the body. Cells with dispersed organelles give rise to the general colour pattern of the animal, whereas chromatophores with aggregated organelles appear less coloured (reviewed by Luby-Phelps and Schliwa, 1982; Obika, 1986).

Several mutations have been described in different amphibian species that affect different aspects of vertebrate pigmentation (Frost and Malacinski, 1980; Frost et al., 1982; Droin, 1992). To gain a more detailed insight into the different aspects of vertebrate pigmentation it would be helpful to study a collection of mutations in one species. The zebrafish is an ideal system for using the powerful tools of genetics to study different aspects of vertebrate pigmentation (Mullins et al., 1994; Mullins and Nüsslein-Volhard, 1993; Haffter et al.,

1996). Mutations affecting the development of the adult pigment pattern in the zebrafish have been described previously (Kirschbaum, 1975; Johnson et al., 1995).

Zebrafish xanthophore pigmentation first becomes apparent after 42 hours of development (high pec stage) in the dorsal head as a very pale cast of yellow (Kimmel et al., 1995). However, individual xanthophore cells are difficult to distinguish. After 3 days of development (protruding mouth stage), strong yellow xanthophore pigmentation is apparent in the entire dorsal half of the body in regions devoid of melanophores. Xanthophores become granular after 5 days of development and are now seen throughout the body, with greater numbers dorsally. Adult zebrafish have five alternating blue-black (melanophores and iridophores) and silvery-yellow (xanthophores and iridophores) stripes aligned parallel to the long axis of the body. This stripe pattern extends into the caudal and anal fins, but not into the dorsal and the paired lateral fins (Kirschbaum, 1975). Studies of adult pigmentation mutants revealed interactions between melanophores and iridophores in pigment pattern formation (Johnson et al., 1995). In contrast, little is known about the interaction of the xanthophores with other chromatophores (Epperlein and Löfberg, 1984; Goodrich et al., 1954).

In a screen for mutants with defects in embryonic development, many embryonic pigmentation mutants were isolated that allow the study of different aspects of pigment cell development (Kelsh et al., 1996). In this paper we describe mutations affecting the development of xanthophore pigmentation. We provide evidence that genes involved in three different aspects of xanthophore development were isolated in the screen. Mutations in *salz* and *pfeffer* lead to an adult pigment pattern phenotype that is probably due to a reduced number of xanthophore cells in the body. Mutations in *edison*, *yobo*, *yocca* and *brie* affect the pteridine content and so probably function in pigment synthesis or uptake. Mutations in *esrom*, *tilsit* and *tofu* affect retinotectal axon pathfinding as well as xanthophore pigmentation, and might be required for pigment translocation or for the generation of normal xanthophore cell shape.

## MATERIALS AND METHODS

### Fish raising, screen and crosses

Fish stocks were maintained as previously described by Mullins et al.

(1994), the isolation of the mutants and the complementation analysis was performed as described by Haffter et al. (1996).

### Ascending chromatography

Thin-layer chromatography was carried out as described by Epperlein and Claviez, (1982a). After 3 days of development 45 embryos were extracted with 100 µl diluted ammonia, 0.1% β-mercaptoethanol, pH 10.0. 25 µl were applied to heat-activated silica (Silica gel IB2, J. T. Baker) and cellulose (Cellulose F1440, Schleicher and Schuell) plates. Chromatography was allowed to proceed for 3 hours using n-propanol/1% ammonia (2:1) as a solvent. R<sub>F</sub> is the distance migrated by the substance divided by the distance migrated by the solvent.

### Fluorescence pictures

Embryos were mounted in methyl cellulose with 1 drop of 0.2% 3-aminobenzoic acid ethyl ester (Sigma), 1 drop of dilute ammonia, 0.1% β-mercaptoethanol, pH 10.0, and were illuminated with UV light (DAPI-filter 395-420). The dilute ammonia liberates pteridines from their protein carriers at high pH. These are then visualized as light blue fluorescence (Ziegler, 1965; Epperlein and Claviez, 1982a). Photographs were taken with 160 ASA tungsten films.

## RESULTS

### Genes required for xanthophore development

In a large-scale screen for mutations leading to defects during the first 6 days of development, we screened for pigmentation phenotypes on the 3rd and 6th day of development (Haffter et al., 1996). A total of 284 mutations affecting larval pigmentation were isolated (Kelsh et al., 1996). Of these, 124 mutants (41 genes) show xanthophore pigmentation defects (Table 1 and Kelsh et al., 1996). 20 mutants, defining 14 complementation groups, have defects in all three types of pigment cells, that is the melanophores, the iridophores and the xanthophores. Xanthophores and melanophores are affected in 19 mutants, which make up four complementation groups. Xanthophore and iridophore pigmentation is affected by mutations in at least six genes (20 mutants). In this paper we focus on mutations in 17 genes (64 mutations), which lead to defects in xanthophores without an effect on larval melanophore or iridophore pigmentation. Xanthophore specification or migration are probably affected in *salz* (*sal*) and *pfeffer* (*pfe*) (Class II, missing cell type in Kelsh et al., 1996), whereas the other genes are probably required for xanthophore differentiation. Mutations affecting xanthophore pigmentation lead to pale

**Table 1. Classes of mutations affecting xanthophore pigmentation**

| Affected pigment cell type                 | Number of mutants | Number of genes (alleles) | Gene names (alleles)                                                                                                                                                                                                                                                                                                        | Unresolved (mutants)                                                                              |
|--------------------------------------------|-------------------|---------------------------|-----------------------------------------------------------------------------------------------------------------------------------------------------------------------------------------------------------------------------------------------------------------------------------------------------------------------------|---------------------------------------------------------------------------------------------------|
| Xanthophores, Melanophores and Iridophores | 21                | 14 (20)                   | <i>blanched</i> (1), <i>bleached</i> (3), <i>bleich</i> (1), <i>colourless</i> (2), <i>pech</i> (1), <i>puzzle</i> (1), <i>sahne</i> (1), <i>sallow</i> (1), <i>sunbleached</i> (1), <i>stonewashed</i> (1), <i>u-boot</i> (1), <i>weiss</i> (1), <i>washed out</i> (4), <i>white tail</i> (1)                              | 1 ( <i>tc233b</i> )                                                                               |
| Xanthophores and Melanophores              | 19                | 4 (17)                    | <i>cold-light</i> (2), <i>polished</i> (2), <i>stars and stripes</i> (12), <i>tinte</i> (1)                                                                                                                                                                                                                                 | 2 ( <i>tc249</i> , <i>tz294</i> )                                                                 |
| Xanthophores and Iridophores               | 20                | 6 (14)                    | <i>choco</i> (2), <i>cookie</i> (2), <i>milky</i> (3), <i>matt</i> (1), <i>pistachio</i> (5), <i>vanille</i> (1)                                                                                                                                                                                                            | 6 ( <i>tj266c</i> , <i>tm107</i> , <i>tq262a</i> , <i>tu235b</i> , <i>tz284</i> , <i>ty105g</i> ) |
| Xanthophores                               | 64                | 17 (62)                   | <i>bressot</i> (1), <i>brie</i> (4), <i>esrom</i> (14), <i>clorix</i> (1), <i>edison</i> (11), <i>feta</i> (1), <i>kefir</i> (2), <i>non blond</i> (1), <i>pfeffer</i> (6), <i>quark</i> (6), <i>ricotta</i> (1), <i>salz</i> (7), <i>tartar</i> (1), <i>tilsit</i> (1), <i>tofu</i> (1), <i>yobo</i> (3), <i>yocca</i> (1) | 2 ( <i>tm14</i> , <i>ta53b</i> )                                                                  |

**Table 2. Genes required for xanthophore pigmentation but not for melanophore or iridophore development**

| Gene                           | Alleles                                                                                                 | Adult viability | Other phenotypes                                           | Other descriptions |
|--------------------------------|---------------------------------------------------------------------------------------------------------|-----------------|------------------------------------------------------------|--------------------|
| <b>Pigment cell number:</b>    |                                                                                                         |                 |                                                            |                    |
| <i>pfeffer (pfe)</i>           | <i>tm236b&gt;tq211&gt;tg17&gt;tc227b&gt;te220 &gt;tg283a</i>                                            | Viable          | Dominant and recessive adult phenotype                     | a,b                |
| <i>salz (sal)</i>              | <i>tl241&gt;tf34&gt;tp71c&gt;tt254a&gt;tm246b&gt;tb213c&gt;tf238b</i>                                   | Viable          | Dominant and recessive adult phenotype                     | a,b                |
| <b>Pigment synthesis:</b>      |                                                                                                         |                 |                                                            |                    |
| <i>edison (edi)</i>            | <i>tc245c, tk232, tl35a, tl245, to255b, tp62, tp67b, tr276, tt232, tv04, tz253</i>                      | Lethal          | Fluorescence in entire embryo                              |                    |
| <i>tartar (tar)</i>            | <i>td09</i>                                                                                             | Viable          | Fluorescence in entire embryo<br>Recessive adult phenotype | b                  |
| <i>brie (bri)</i>              | <i>tg211b, tj226a, tm42c, tu269</i>                                                                     | Viable          |                                                            |                    |
| <i>yobo (yob)</i>              | <i>tc251, tk13, ty44d</i>                                                                               | Viable          | Maternal effect<br>Small iris in adult fish                | b                  |
| <i>yocca (yoc)</i>             | <i>tm86</i>                                                                                             | Viable          |                                                            |                    |
| <b>Pigment distribution:</b>   |                                                                                                         |                 |                                                            |                    |
| <i>esrom (esr)</i>             | <i>tb241a, te250, te275, te279, te376, tf04z, tg05, tg265, th222, th36a, tj236, tm207, tp203, ts208</i> | Lethal          | Retinotectal axon pathfinding                              | c                  |
| <i>tilsit (til)</i>            | <i>ty130b</i>                                                                                           | Lethal          | Retinotectal axon pathfinding                              | c                  |
| <i>tofu (tof)</i>              | <i>tq213c</i>                                                                                           | Viable          | Retinotectal axon pathfinding                              | c                  |
| <b>Not further classified:</b> |                                                                                                         |                 |                                                            |                    |
| <i>bressot (bst)</i>           | <i>tp223b</i>                                                                                           | Lethal          |                                                            |                    |
| <i>feta (fet)</i>              | <i>ty107</i>                                                                                            | Viable          |                                                            |                    |
| <i>kefir (kef)</i>             | <i>ta65b, tf229 (lost)</i>                                                                              | Viable          |                                                            |                    |
| <i>quark (qua)</i>             | <i>tc276, tg239d, tk236, to241b, tp72g, tv46</i>                                                        | Viable          |                                                            |                    |
| <i>ricotta (ric)</i>           | <i>tb212</i>                                                                                            | Viable          |                                                            |                    |
| <i>clorix (clx)</i>            | <i>tj244</i>                                                                                            | Lethal          | Small otoliths<br>Motility defect                          | d<br>e             |
| <i>non blond (nob)</i>         | <i>tt288</i>                                                                                            | Lethal          | Small otoliths<br>General retardation                      | d                  |
| <b>Unresolved:</b>             |                                                                                                         |                 |                                                            |                    |
| <i>m14</i>                     | <i>tm14</i>                                                                                             | Lethal          | Jaw defects                                                |                    |
| <i>ta53b</i>                   | <i>ta53b</i>                                                                                            | Lethal          | Tectum necrosis                                            |                    |

Alleles of different strength are listed according to descending strength separated by >.

References: a, Kelsh et al. (1996); b, Haffter, personal communication; c, Karlstrom et al. (1996); d, Whitfield et al. (1996); e, Granato et al. (1996).

yellow, whitish or granular cells (Class VI.J, pale xanthophores in Kelsh et al., 1996). Of the 17 genes required for xanthophore pigmentation, larvae mutant for any of six genes, *bressot (bst)*, *clorix (clx)*, *edison (edi)*, *esrom (esr)*, *non blond (nob)* and *tilsit (til)*, die in larval stages, whereas mutant larvae for any of the other 11 genes survive to adulthood.

### Xanthophore specification and migration

In *sal* and *pfe* mutant embryos a partial absence of xanthophores in the dorsal head becomes apparent after 4 days of development whereas melanophore and iridophore pigmentation appears normal. 1 day later, large areas devoid of granular xanthophores can be seen, and only a few individual yellow spots in the dorsal head are present (arrows in Fig. 1C,E). The overall number of xanthophores is reduced in *pfe* larva, as visualized by their fluorescence under UV light (Fig. 1D). In *sal* mutant larvae the number of xanthophores is strongly reduced in lateral and ventral regions, whereas many xanthophores remain dorsal to the neural tube (Fig. 1F and data not shown). The strength of the defect in mutant larvae of both genes is dependent on the allele; weak alleles produce a slightly reduced number of xanthophores (data not shown), whereas in embryos with strong alleles only a very small number of xanthophores is detectable in the body. For the strong allele *pfe<sup>tq211</sup>*, we observed a slight reduction in the number of xanthophore cells, and also in heterozygous larvae (data not shown).

Heterozygous adult fish carrying a mutation in *sal* or in *pfe* show irregular and interrupted melanophore stripes (shown for *pfe* in Fig. 2B), thus indicating a defect in the formation or maintenance of the adult melanophore pattern. Xanthophores in the adult heterozygous fish are detectable at a slightly lower density (data not shown; Haffter, personal communication). The general appearance is slightly less yellow than wild type fish. We compared the dominant adult phenotypes to determine the relative strength of different alleles, which gave the same results as counting the xanthophore number in the larva (Table 2).

Homozygous *sal* and *pfe* fish can be raised to adulthood. After 3 to 4 weeks of development these fish can be distinguished from wild type by a pigment pattern phenotype: the spotted melanophore stripe pigmentation (blue-black stripes) fades out towards the tail and shows a 'salt and pepper'-like appearance. This phenotype is very prominent in the adult fish, and no xanthophores are detectable in the body of embryos with the strong alleles (Fig. 2C and data not shown). The weakest allele, *pfe<sup>tg283a</sup>*, does not produce any obvious phenotype in the heterozygous or homozygous adults.

### Defects in pteridine synthesis in *edison*, *tartar*, *brie*, *yocca* and *yobo*

In *edison (edi)* larvae no yellow pigmentation is detectable (Fig. 3C). *edi* mutant embryos can be detected by the strong blue fluorescence of embryonic cells including the yolk under



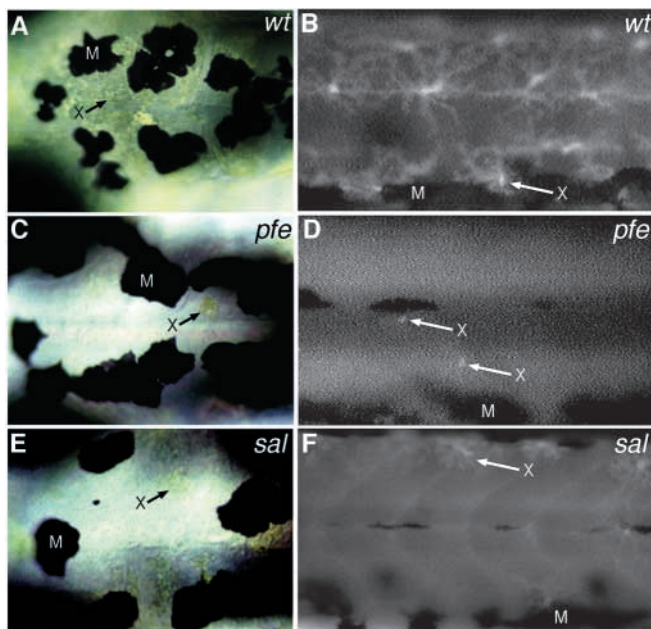

**Fig. 1.** The number of xanthophore cells is reduced in *salz* and *pfeffer* homozygous larvae. Dorsal views of day-6 larvae in the head region posterior to the eyes, viewed with nomarski optics (A,C,E) and lateral view of ammonia-induced fluorescence in the trunk under UV light epi-illumination (B,D,F). Wild type (A,B) and homozygous mutant larva of *pfe<sup>tg211</sup>* (C,D) and *sal<sup>tl241</sup>* (E,F). M, melanophores; X and arrow, xanthophores.

illumination with UV light after 24 hours of development (Fig. 4). This fluorescence subsequently decreases, and by day 6 fluorescence is mainly located in the gut and is excreted. A single allele for *tartar* (*tar*) was isolated and this shows a similar but slightly weaker phenotype to that of *edi*. Weak yellow pigmentation can be detected in *tar* embryos after 5 days of development (data not shown). Similarly to *edi*, *tar* embryos show blue fluorescence in the entire embryo. In mutant *edi* and *tar* embryos abnormally shaped and brightly fluorescing xanthophores are present in the body (shown for *edi* in Fig. 3D). In contrast to *edi*, homozygous *tar* fish survive to adulthood and show pale melanophore stripes in the adult (data not shown).

As a first attempt to investigate the synthesis of yellow pigments in the mutants, we performed thin-layer chromatography of larvae to analyze the pteridine components in one allele each of *brie*, *esrom*, *edison*, *feta*, *pfeffer*, *quark*, *salz*, *tartar*, *yobo* and *yocca*. In wild-type larvae, eight different fluorescent bands can be visualized by UV light on the chromatogram (Table 3). Two bands show visible yellow colour (bands 3 and 7) and therefore are most likely to be sepiapterins (Matsumoto and Obika, 1968; reviewed by Bagnara, 1966). The other six bands, which are colourless under visible light, show fluorescent colours under UV light, are probably colourless pteridines such as biopterin and neopterin (light blue fluorescence), xanthopterin (green fluorescence) and isoxanthopterin (dark blue fluorescence). Correlations between the known pteridines and the eight bands detectable in the wild-type larvae are so far not clear.

Larvae mutant for any of three genes, *brie* (*bri*), *yocca* (*yoc*) and *yobo* (*yob*), show similar pteridine patterns that differ from

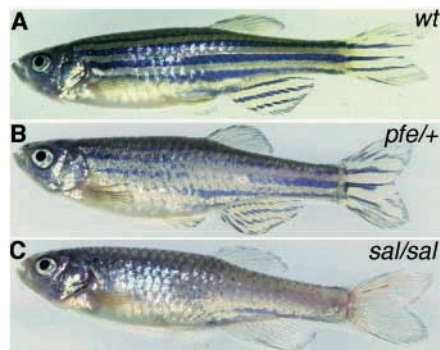

**Fig. 2.** Adult fish that are heterozygous or homozygous for *salz* or *pfeffer* show pigment pattern defects. (A) Wild-type, (B) heterozygous *pfe<sup>tg17</sup>* and (C) homozygous *sal<sup>tl254a</sup>* fish in a lateral view.

wild type. The intensity of three fluorescent bands is increased (band 2 increased, band 4 blue instead of green, band 5 strongly increased), and the intensity of two other bands is reduced (bands 6 and 8). For the other seven genes no changes were found.

Xanthophores, as judged by morphological criteria, are different in the three mutants, which show unusual pteridine composition. In *bri*, cells appear feathery and whitish with normal granularity after 5 days of development (Fig. 3E and data not shown); under fluorescent light these cells appear greenish (Fig. 3F). Xanthophores in *yoc* mutant larvae appear brownish in the head. Under UV light these cells show a diffuse greenish fluorescence (data not shown). Faintly granular xanthophores with reduced yellow pigmentation are detectable in the head of *yob* mutant larvae, and fluorescent cells are not detectable in the body (data not shown). Xanthophores in homozygous adult *yob*, *yoc* and *bri* fish appear

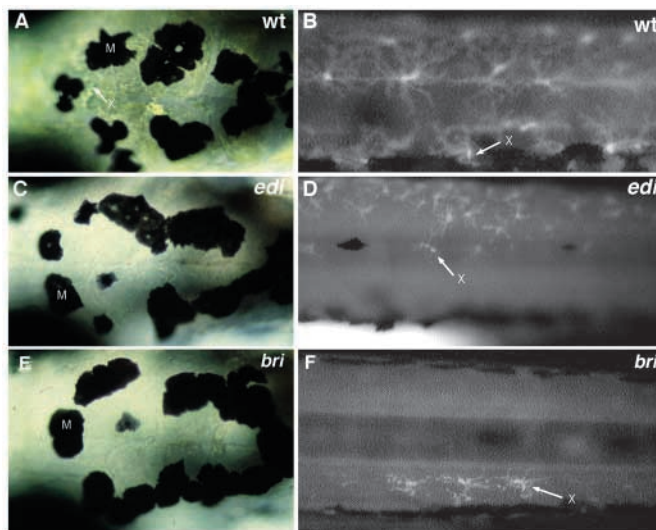

**Fig. 3.** Xanthophore pigment is reduced in *edison* and *brie*. Day 6 larva, dorsal view of the head region posterior to the eyes, viewed with nomarski optics (A,C,E) and lateral view of ammonia-induced fluorescence in the trunk under UV light epi-illumination (B,D,F). Wild type (A,B) and homozygous mutant larvae of *edi<sup>to255b</sup>* (C), *edi<sup>tc245c</sup>* (D), and *bri<sup>tl226a</sup>* (E,F). M, melanophores; X and arrow, xanthophores.

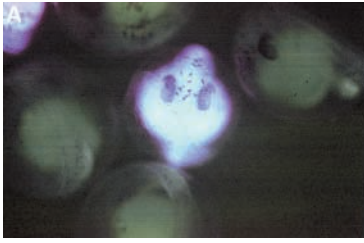

**Fig. 4.** Mutant *edison* embryos show strong autofluorescence under UV-light illumination. Embryos at the pharyngula period derived from two heterozygous carriers for *edi*<sup>tk232</sup>. Homozygous mutant *edi* embryos show strong blue fluorescence in the entire embryo, whereas wild-type siblings show only background levels.

normal. Homozygous *yob* fish do show a seemingly unrelated adult phenotype; the iris in the eye is small (Haffter, personal communication).

### Maternal effect phenotype of *yob*

Females homozygous for *yob* produce embryos that develop

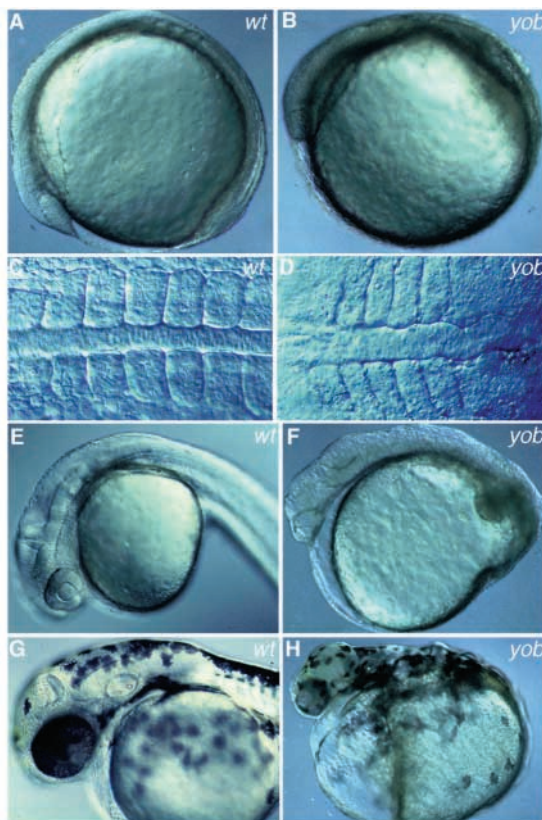

**Fig. 5.** Embryos derived from homozygous mutant *yob*<sup>ty44d</sup> females show a maternal effect phenotype. Lateral view of (A) a wild-type embryo and (B) an embryo derived from a *yob* homozygous female at the 5-somite stage, showing the reduced length of the body. (C) Dorsal view of a 10-somite stage wild-type embryo and (D) a 10-somite stage embryo derived from a *yob* homozygous female showing the wider axis. Lateral view of a wild-type embryo (E) and an embryo derived from a *yob* homozygous female (F) at the pharyngula period, showing the head and tail defects. Lateral view of a wild-type embryo (G) and an embryo derived from a *yob* homozygous female (H) at the hatching period.

more slowly than embryos derived from heterozygous females or from females homozygous for any of the other viable xanthophore mutations. By day 2, head and tail truncations of variable strengths are observed. The strength of this maternal effect phenotype varies amongst the different alleles. A slow epiboly phenotype was found for embryos derived from a female homozygous for the strongest allele *yob*<sup>tk13</sup> (data not shown). In embryos derived from a female with the intermediate allele *yob*<sup>ty44d</sup>, epiboly is normal but the antero-posterior extension is reduced, whereas the axis is broadened laterally (Fig. 5B,D). This leads to a similar but slightly weaker epiboly phenotype (Fig. 5F,H) than that produced by the strongest allele described above. In many embryos the eyes are fused in front of the head and the tail is completely missing (Fig. 5F). In the case of the weakest allele, *yob*<sup>tc251</sup>, some embryos derived from homozygous females are indistinguishable from wild type. The strength of the embryonic phenotype is determined by the mother and is independent of the zygotic genotype (data not shown), indicating that the zygotic function of *yob* is restricted to xanthophore development.

### *esr*, *til* and *tof* show defects in xanthophore pigmentation and in the retinotectal axon pathfinding

Overall xanthophore pigmentation is reduced in mutant larvae of *esrom* (*esr*), *tilsit* (*til*) and *tofu* (*tof*) after 5 days of development, although distinct yellow cells are apparent (shown for *til* in Fig. 6C). Xanthophores appear more compact and less granular compared to wild type (arrow in Fig. 6C). Under UV light, the characteristic fluorescent spot at the center of each xanthophore appears brighter and more compact in larvae mutant for each of these three genes than in wild type, whereas the dendritic extensions of the xanthophores appear more spread out in *esr* and *til* larvae (shown for *til* in Fig. 6D).

In addition to the pale xanthophore pigmentation phenotype, mutant *esr*, *til* and *tof* larvae show a defect in retinotectal axon pathfinding (Karlstrom et al., 1996). The occurrence of both phenotypes in *esr*, *til* and *tof* mutants suggests that these genes

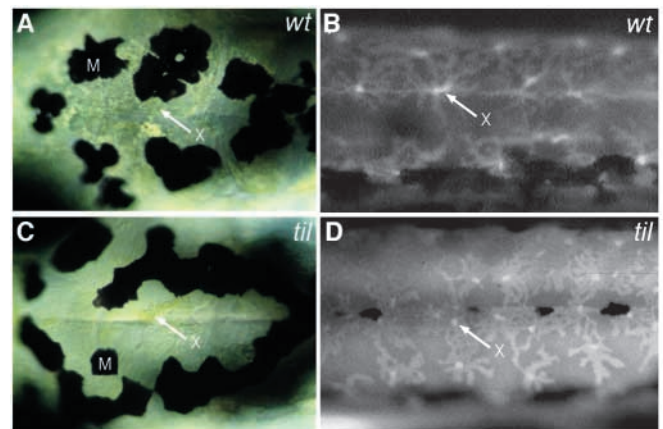

**Fig. 6.** In *tilsit* mutants xanthophore pigment appears condensed whereas the cells appear more spread out. Dorsal view of day-6 larva in the head region posterior to the eyes, viewed with Nomarski optics (A,C), and lateral view of ammonia-induced fluorescence in the trunk under UV-light epi-illumination (B,D). (A,B) Wild type and (C,D) homozygous mutant larva of *til*<sup>ty130b</sup>. M, melanophores; X, and arrow, xanthophores.

**Table 3. Pteridine fluorescence in mutant larvae at day 6**

| Colour         |               |                | Mutant larvae |            |            |            |            |            |            |            |            |            |            |
|----------------|---------------|----------------|---------------|------------|------------|------------|------------|------------|------------|------------|------------|------------|------------|
| UV light       | Visible light | R <sub>F</sub> | <i>wt</i>     | <i>yoc</i> | <i>bri</i> | <i>yob</i> | <i>edi</i> | <i>pfe</i> | <i>sal</i> | <i>esr</i> | <i>tof</i> | <i>fet</i> | <i>qua</i> |
| 1) Orange      | No            | 0.75           | –             | –          | –          | –          | –          | –          | –          | –          | –          | –          | –          |
| 2) Light blue  | No            | 0.52           | –             | +          | +          | +          | –          | –          | –          | –          | –          | –          | –          |
| 3) Orange      | Yellow        | 0.48           | +             | +          | +          | +          | +          | +          | +          | +          | +          | +          | +          |
| 4) Light green | No            | 0.45           | –             | +(b)       | +(b)       | +(b)       | –          | –          | –          | –          | –          | –          | –          |
| 5) Light green | No            | 0.24           | –             | +          | +          | +          | –          | –          | –          | –          | –          | –          | –          |
| 6) Dark blue   | No            | 0.19           | +             | +          | –          | –          | +          | +          | +          | +          | +          | +          | +          |
| 7) Orange      | Yellow        | 0.11           | +             | +          | +          | +          | +          | +          | +          | +          | +          | +          | +          |
| 8) Dark blue   | No            | 0.06           | +             | –          | –          | –          | +          | +          | +          | +          | +          | +          | +          |

R<sub>F</sub> is the distance migrated by the substance divided by the distance migrated by the solvent.

The intensity of the bands was divided into two classes, strong (+) and weak (–). (b) indicates a blue-coloured instead of a green-coloured band. The alleles used were: *yoc* (*tm86*), *bri* (*tj226a*), *yob* (*ty44d*), *edi* (*to255b*), *pfe* (*tg17*), *sal* (*tt254a*), *esr* (*th222*), *tof* (*tq213c*), *fet* (*ty107*) and *qua* (*tk236*).

may encode components of the cytoskeleton required for both pigment cell morphology and axonal pathfinding of retinal axons.

### Mutants with other xanthophore defects

Mutations in two genes, *kefir* (*kef*) and *feta* (*fet*), result in changed colours of the xanthophores. In 5-day-old *kef* embryos, whitish cells with faint granularity appear throughout the xanthophore regions, whereas in *fet* mutant embryos brownish cells can be detected in these positions (data not shown). In *quark* (*qua*) mutant embryos the granularity of the xanthophores is strongly reduced, whereas mutations in *ricotta* (*ric*) and *bressot* (*bst*) lead to reduced or no xanthophore pigmentation.

In addition to the xanthophore pigmentation phenotype, further defects are detectable in *non blond* (*nob*) and *clorix* (*clx*) mutant larvae. Mutations in both genes lead to small otoliths (Whitfield et al., 1996). Whereas *nob* larvae are generally retarded, *clx* mutant embryos show an additional motility (Granato et al., 1996) and melanophore pigmentation defect.

## DISCUSSION

### Genes required for xanthophore development

In our screen for mutations with morphologically visible embryonic and larval phenotypes, we identified 17 genes required for larval xanthophore pigmentation, but without any effect on melanophores and iridophores. Multiple alleles were isolated for nine genes, ranging from two alleles (*kef*) to 14 alleles (*esr*). For eight genes only a single allele was isolated for each, leading to an average allele frequency of 3.6. From the average allele frequency of this phenotypic class we conclude that we probably identified most of the genes required specifically for xanthophore pigmentation in our screen. We might have missed additional alleles of *feta*, *tilsit*, and *yocca*, because the phenotypes of the single alleles are very weak.

### Pigment pattern formation is different in the larva and in the adult

One surprising result of this study is the finding that most mutants with strongly reduced xanthophore pigmentation in the larva show no obvious xanthophore phenotype as adults (as observed under a dissecting microscope), indicating that larval

and adult xanthophore pigmentation in the zebrafish require different genes. Mutations in only three genes (*salz*, *pfeffer* and *tartar*) cause adult phenotypes. Whereas xanthophores and melanophores are pale in *tar* homozygous adults, xanthophores are not detectable in *sal* and *pfe* homozygous adults.

Larval xanthophores in fish occupy the zones not occupied by melanophores (Epperlein and Claviez, 1982b). In *sandy* mutant larvae unpigmented melanophores form unpigmented gaps between pigmented xanthophores in the dorsal head (*sandy* in class VI.A, Fig. 6 in Kelsh et al., 1996). However, if the number of melanophores is reduced, as in *sparse* mutant larvae, xanthophores fill the vacant positions of the melanophores (*sparse* in class III, Fig. 3 in Kelsh et al., 1996). The observation of unpigmented spaces between melanophores and iridophores in *sal* and *pfe* larvae indicates that in the wild-type situation xanthophores fill the gaps between the melanophore and iridophore stripes.

Whereas xanthophores are apparently not required for the proper formation of the larval melanophore stripes, they have an important function in adult pigment pattern formation. Partial absence of xanthophores in *sal* and *pfe* heterozygous adult fish leads to irregular blue-black stripes, and a 'salt and pepper' pattern of melanophore pigmentation fading out towards the tail. A similar but stronger phenotype can be observed in homozygous mutant fish. The correlation of a reduced number of xanthophores with an irregular melanophore pattern in the adult is in agreement with earlier findings, which indicated that the xanthophores play an important role in pigment pattern formation in the body (Epperlein and Claviez, 1982a; Epperlein and Löfberg, 1984) and in the anal fin (Goodrich and Nichols, 1931; Goodrich et al., 1954). The correlation between xanthophore and melanophore pattern can also be seen in adult zebrafish that are mutant for *leopard*, where the number of xanthophores in the anal fin is reduced and the melanophore pigment pattern is disrupted as well (Kirschbaum et al., 1975; Haffter, personal communication). A similar influence on the adult melanophore pigment pattern by iridophores has been found (Johnson et al., 1995; Haffter, personal communication). In mutants where the number of iridophores is reduced (*transparent*, *rose*, *shady*), the melanophore pattern in the adult body is disrupted. Again this influence is restricted to the adult pigment pattern and has no effect on larval pigment pattern formation. At present it is unclear whether xanthophores have a function in the initiation or in the maintenance of the melanophore stripes. A more



detailed analysis of the transition from the larval to the adult pigment pattern in these mutants is required to address this point.

### Pteridine composition is different in *bri*, *yob* and *yoc*

Mutations in three genes (*edi*, *bri* and *qua*) lead to the complete loss of yellow colour, whereas in all other xanthophore mutants the yellow colour is only reduced. It has been previously shown that xanthophores contain different kinds of pteridine pigments (Matsumoto and Obika, 1968; reviewed by Bagnara, 1966). They appear almost simultaneously with the differentiation of xanthophores (Kamei-Takeuchi and Hama, 1971). Specific sets of pteridines are described for many species. Most frequently xanthophores contain sepiapterine (visible yellow), drosopterin (visible red) and colourless pteridines (biopterin).

As a first step towards an analysis of the pteridine biochemistry, we performed thin-layer chromatography. We identified eight different bands that are visible under UV light. Two of these bands are visibly yellow and are therefore probably sepiapterines, whereas the others are colourless under normal illumination; no red drosopterins were found in this analysis (Matsumoto and Obika, 1968; reviewed by Bagnara, 1966). A detailed analysis will be necessary to determine which of the bands correspond to known pteridines. Mutations in three genes, *bri*, *yob* and *yoc*, produce similar differences in pteridine composition compared to wild type and may encode enzymes required to produce specific pteridines. Further chromatographical analysis of wild-type and mutant larvae is required to resolve the pathway for pteridine synthesis.

Mutations in two genes, *edison* and *tartar*, lead to blue fluorescence in the yolk and the entire embryo. We propose that *edi* and *tar* encode enzymes required for early steps in pteridine synthesis. The lack of *edi* and *tar* function in mutant embryos leads to the accumulation of fluorescent intermediates that, in the case of *edi*, seem to be toxic for the larvae. This phenotype would predict a change in pteridine composition. Surprisingly, we have not yet found a difference in the pteridine pattern for *edi* using chromatography. A more detailed analysis needs to be carried out to allow further characterization of the biochemical defects in these mutants.

### *Yobo* has similarities to the *Drosophila* mutation *deep orange*

The *yob* gene product has at least two biological functions during development. The first function is in pteridine synthesis, since pteridine composition is altered in *yob* mutant embryos. The second function, provided maternally, is required in the embryo for normal early development. Several genes with a similar combination of zygotic and maternal requirement are known in *Drosophila*. For example, mutations in the *deep orange* (*dor*) gene lead to both a maternal effect phenotype and a change in eye colour. The phenotype is accompanied by alterations in pteridine composition (Counce, 1957). The strength of the embryonic *yob* phenotype is independent of the zygotic genotype, indicating that zygotic *yob* function is not required during early development. This is in contrast to *dor*, for which expression is also required zygotically for embryonic development.

### Xanthophores and retinotectal projection

Three mutants (*esr*, *til*, *tof*) were isolated with defects in xan-

thophore pigmentation and retinotectal axon pathfinding. Yellow pigmentation is concentrated towards the cell center in mutants of all three genes and the morphology of the xanthophores under UV light is abnormal. The distribution of the coloured organelles within the pigment cell is important for the general appearance of the body colour. Dispersed organelles lead to a strong colour, whereas pigment cells with aggregated organelles are weakly coloured (reviewed by Luby-Phelps and Schliwa, 1982; Obika, M., 1986). The pigmentation phenotype in *esr*, *til* and *tof* could be explained by a defect in pigment translocation. Retinotectal axons stop prematurely on their way to the tectum and show mapping defects if they reach the tectum (Karlstrom et al., 1996). The phenotypes observed in seemingly unrelated cell types suggests that *esr*, *til* and *tof* may encode components of the cytoskeleton. It further suggests that these genes are required in a common pathway for both pigment cell morphology and axonal pathfinding of retinal axons. This hypothesis will have to be tested by a careful analysis of the cytoskeleton in the xanthophores and the retinal axons.

In summary, the collection of mutants described here and by Kelsh et al. (1996) will be helpful tools to gain insight into different processes involved in vertebrate pigmentation.

We thank Silke Rudolph for technical assistance, Joel Wilson and Cornelia Fricke for their help in the fish work and the thin layer chromatography, and Darren Gilmour for help with the manuscript.

## REFERENCES

- Bagnara, J. T. and Stackhouse, H. L. (1961). Purine components of guanophores in amphibians. *Anat. Rec.* **139**, 292.
- Bagnara, J. T. (1966). Cytology and cytophysiology of non-melanophore pigment cells. *Intern. Rev. Cytol.* **20**, 173-205.
- Bagnara, J. T. (1976). Colour change. In *Physiology of the Amphibia*, Vol. 3 (ed. B. Lofts), pp. 1-52. New York: Academic Press.
- Bagnara, J. T., Matsumoto, J., Ferris, W., Frost, S. K., Turner, W. A., Jr., Tchen, T. T. and Taylor, J. D. (1979). Common origin of pigment cells. *Science* **203**, 410-415.
- Birbeck, M. S. C. (1963). Electron microscopy of melanocytes: the fine structure of hair-bulb premelanophores. *Ann. New York Acad. Sci.* **100**, 540.
- Charles, A. and Ingram, J. T. (1959). Electron microscope observations of the melanocyte of the human epidermis. *J. Biophys. Biochem. Cytol.* **6**, 41-44.
- Counce, S. J. (1957). A female-sterile mutant (*Deep orange*) of *Drosophila melanogaster*: Increasing isoxanthopterin content. *Experientia* **13**, 354-356.
- Drochmans, P. (1960). Electron microscope studies of epidermal melanocytes, and the fine structure of melanin granules. *J. Biophys. Biochem. Cytol.* **8**, 165-180.
- Droin, A. (1992). Genetic and experimental studies on a new pigment mutant in *Xenopus laevis*. *J. Exp. Zool.* **264**, 196-205.
- DuShane, G. P. (1934). The origin of pigment cells in amphibia. *Science* **80**, 620-621.
- Epperlein, H. H. and Claviez, M. (1982a). Changes in the distribution of melanophores and xanthophores in *Triturus alpestris* embryos during their transition from the uniform to banded pattern. *Wilhelm Roux's Arch. Dev. Biol.* **192**, 5-18.
- Epperlein, H. H. and Claviez, M. (1982b). Formation of pigment cell patterns in *Triturus alpestris* embryos. *Dev. Biol.* **91**, 497-502.
- Epperlein, H. H. and Löfberg, J. (1984). Xanthophores in chromatophore groups of the premigratory neural crest initiate the pigment pattern of the axolotl larva. *Wilhelm Roux's Arch. Dev. Biol.* **193**, 357-369.
- Frost, S. K. and Malacinski G. M. (1980). The developmental genetics of pigment mutants in the mexican axolotl. *Dev. Genet.* **1**, 271-294.
- Frost, S. K., Ellinger, M. S. and Murphy, J. A. (1982). The pale mutation in *Bombina orientalis*: Effects on melanophores and xanthophores. *J. Exp. Zool.* **221**, 125-129.
- Goodrich, H. B. and Nichols, R. (1931). The development and the

- regeneration of the colour pattern in *Brachidanio rerio*. *J. Morph. Physiol.* **52**, 513-518.
- Goodrich, H. B., Marzullo, C. M. and Brownson, W. H.** (1954). An analysis of the formation of colour patterns in two fresh-water fish. *J. Exp. Zool.* **125**, 487-505.
- Granato, M., van Eeden, F. J. M., Schach, U., Trowe, T., Brand, M., Furutani-Seiki, M., Haffter, P., Hammerschmidt, M., Heisenberg, C.-P., Jiang, Y.-J., Kane, D. A., Kelsh, R. N., Mullins, M. C., Odenthal, J. and Nüsslein-Volhard, C.** (1996). Genes controlling and mediating locomotion behavior of the zebrafish embryo and larva. *Development* **123**, 399-413.
- Haffter, P., Granato, M., Brand, M., Mullins, M. C., Hammerschmidt, M., Kane, D. A., Odenthal, J., van Eeden, F. J. M., Jiang, Y.-J., Heisenberg, C.-P., Kelsh, R. N., Furutani-Seiki, M., Vogelsang, E., Beuchle, D., Schach, U., Fabian, C. and Nüsslein-Volhard, C.** (1996). The identification of genes with unique and essential functions in the development of the zebrafish, *Danio rerio*. *Development* **123**, 1-36.
- Hama, T.** (1963). The relation between the chromatophores and pterin compounds. *Ann. New York Acad. Sci.* **100**, 977-986.
- Johnson, S. L., Africa, D., Walker, C. and Weston, J. A.** (1995). Genetic control of adult pigment stripe development in zebrafish. *Dev. Biol.* **167**, 27-33.
- Kamei-Takeuchi, I. and Hama, T.** (1971). Structural changes of pterinosome (pteridine pigment granule) during the xanthophore differentiation of *Oryzias* fish. *J. Ultrastruct. Res.* **34**, 452-463.
- Karlstrom, R. O., Trowe, T., Klostermann, S., Baier, H., Brand, M., Crawford, A. D., Grunewald, B., Haffter, P., Hoffmann, H., Meyer, S. U., Müller, B. K., Richter, S., van Eeden, F. J. M., Nüsslein-Volhard, C. and Bonhoeffer, F.** (1996). Zebrafish mutations affecting retinotectal axon pathfinding. *Development* **123**, 415-426.
- Kelsh, R. N., Brand, M., Jiang, Y.-J., Heisenberg, C.-P., Lin, S., Haffter, P., Odenthal, J., Mullins, M. C., van Eeden, F. J. M., Furutani-Seiki, M., Granato, M., Hammerschmidt, M., Kane, D. A., Warga, R. M., Beuchle, D., Vogelsang, L. and Nüsslein-Volhard, C.** (1996). Zebrafish pigmentation mutations and the processes of neural crest development. *Development* **123**, 369-389.
- Kimmel, C. B., Ballard, W. W., Kimmel, S. R., Ullmann, B. and Schilling, T. F.** (1995). Stages of embryonic development of the zebrafish. *Dev. Dynam.* **203**, 253-310.
- Kirschbaum, F.** (1975). Untersuchungen über das Farbmuster der Zebrabarbe *Brachidanio rerio* (Cyprinidae, Teleostei). *Wilhelm Roux's Arch. Dev. Biol.* **177**, 129-152.
- Luby-Phelps, K. J. and Schliwa, M.** (1982). Pigment migration in chromatophores: A model system for intracellular particle transport. In *Axoplasmic Transport*, pp. 15-26. Berlin, Heidelberg: Springer-Verlag.
- Matsumoto, J., Kalishima, T. and Hama, T.** (1960). Relation between the pigmentation and pterin derivatives of chromatophores during development in the normal black and transparent scaled types of goldfish (*Carassius auratus*). *Genetics* **45**, 1177-1189.
- Matsumoto, J.** (1965a). Studies on fine structure and cytochemical properties of erythrocytes in swordtail, *Xiphophorus helleri*, with special reference to their pigment granules (Pterinosomes). *J. Cell Biol.* **27**, 493-504.
- Matsumoto, J.** (1965b). Role of pteridines in the pigmentation of chromatophores in cyprinid fish, *Japan. J. Zool.* **14**, 45-94.
- Matsumoto, J. and Obika, M.** (1968). Morphological and biochemical characterization of goldfish erythrocytes and their pterinosomes. *J. Cell Biol.* **39**, 233-250.
- Mullins, M. C. and Nüsslein-Volhard, C.** (1993). Mutational approaches to study embryonic pattern formation in the zebrafish. *Curr. Biol.* **3**, 648-654.
- Mullins, M. C., Hammerschmidt, M., Haffter, P. and Nüsslein-Volhard, C.** (1994). Large-scale mutagenesis in the zebrafish: In search of genes controlling development in a vertebrate. *Curr. Biol.* **4**, 189-202.
- Obika, M.** (1963). Association of pteridines with amphibian larva pigmentation and their biosynthesis in developing chromatophores. *Dev. Biol.* **6**, 99-112.
- Obika, M.** (1986). Intracellular transport of pigment granules in fish chromatophores. *Zool. Sci.* **3**, 1-11.
- Obika, M.** (1993). Formation of pterinosomes and carotenoid granules in xanthophores of the teleost *Oryzias latipes* as revealed by the rapid-freezing and freeze-substitution method. *Cell Tissue Res.* **271**, 81-86.
- Rawles, M. E.** (1944). The migration of melanoblasts after hatching into pigment-free skin grafts of the common fowl. *Physiol. Zool.* **17**, 167-183.
- Taylor, J. D.** (1992). Does the introduction of a new player, the endoplasmic reticulum, create more or less confusion in understanding the mechanism(s) of pigmentary organelle translocation. *Pigment Cell Research* **5**, 49-57.
- Whitfield, T. T., Granato, M., van Eeden, F. J. M., Schach, U., Brand, M., Furutani-Seiki, M., Haffter, P., Hammerschmidt, M., Heisenberg, C.-P., Jiang, Y.-J., Kane, D. A., Kelsh, R. N., Mullins, M. C., Odenthal, J. and Nüsslein-Volhard, C.** (1996). Mutations affecting development of the zebrafish inner ear and lateral line. *Development* **123**, 241-254.
- Ziegler, I.** (1965). Pterine als Wirkstoffe und Pigmente. *Ergeb. Physiol. Biochem. Exp. Pharmacol.* **56**, 1-66.
